# Supplementary material
Source: MDPI journal article supplement (https://www.mdpi.com/2079-6447/3/2/6)
Supplement: s1 [file s1]

# Supporting Information

## for

# Optical Investigation of 2-amino-7-isocyanofluorene, a Novel Blue-Emitting Solvatochromic Dye

Bence Kontra <sup>1,2</sup>, Zoltán Mucsi <sup>2,3</sup>, László Vanyorek <sup>3</sup> and Miklós Nagy <sup>3,\*</sup>

<sup>1</sup> Department of Organic Chemistry, Semmelweis University, Hőgyes Endre utca 7, H-1092 Budapest, Hungary; bence.kontra@femtonics.eu

<sup>2</sup> Brain Vision Center, Department of Chemistry, Vendel utca 9, H-1094 Budapest, Hungary; zoltanmucsi@gmail.com

<sup>3</sup> Institute of Chemistry, University of Miskolc, Miskolc-Egyetemváros, H-3515 Miskolc, Hungary; kemvanyi@uni-miskolc.hu

\* Correspondence: nagy.miklos@uni-miskolc.hu

## Table of Contents

|                                                                                                                                                                                                                                                                         |    |
|-------------------------------------------------------------------------------------------------------------------------------------------------------------------------------------------------------------------------------------------------------------------------|----|
| <b>Figure S1.</b> <sup>1</sup> H-NMR spectrum of 2-amino-7-isocyanofluorene ( <b>2,7-ICAF</b> ) .....                                                                                                                                                                   | 2  |
| <b>Figure S2.</b> <sup>13</sup> C NMR spectrum of 2-amino-7-isocyanofluorene ( <b>2,7-ICAF</b> ) recorded at 101 MHz in DMSO- <i>d</i> <sub>6</sub> . .....                                                                                                             | 3  |
| <b>Figure S3.</b> COSY spectrum of 2-amino-7-isocyanofluorene ( <b>2,7-ICAF</b> ) recorded at 400 MHz in DMSO- <i>d</i> <sub>6</sub> . .....                                                                                                                            | 4  |
| <b>Figure S4.</b> HSQC spectrum of 2-amino-7-isocyanofluorene ( <b>2,7-ICAF</b> ) recorded at 400 MHz and 101 MHz in DMSO- <i>d</i> <sub>6</sub> . .....                                                                                                                | 5  |
| <b>Figure S5.</b> HMBC spectrum of 2-amino-7-isocyanofluorene ( <b>2,7-ICAF</b> ) recorded at 400 MHz and 101 MHz in DMSO- <i>d</i> <sub>6</sub> . .....                                                                                                                | 6  |
| Figure S6. Steady-state fluorescence ( <b>top</b> ) excitation, ( <b>bottom</b> ) emission spectra of 2,7-DAF recorded in various solvents of different polarity. ([dye] = 7.40 × 10 <sup>-6</sup> M, T=20 °C). .....                                                   | 7  |
| Figure S7. Steady-state fluorescence ( <b>top</b> ) excitation, ( <b>bottom</b> ) emission spectra of <b>2,7-ICAF</b> recorded in various solvents of different polarity. ([dye] = 4.84 × 10 <sup>-6</sup> M, T=20 °C). .....                                           | 8  |
| <b>Figure S8.</b> Catalán plots for the (a) 2,7-diamino-fluorene ( <b>2,7-DAF</b> ) and (b) 2-amino-7-isocyanofluorene ( <b>2,7-ICAF</b> ). .....                                                                                                                       | 9  |
| Figure S9. The optimized geometry of 2,7-DAF in the ground S <sub>0</sub> state calculated on the TD-B3LYP/6-311++G(2d,2p)//PCM(solvent level of theory. Bond lengths (top), Charge distribution and dipole moment (middle), Vertical excitation (bottom). .....        | 10 |
| Figure S10. The optimized geometry of 2,7-DAF in the first excited S <sub>1</sub> state calculated on the TD-B3LYP/6-311++G(2d,2p)//PCM(solvent level of theory. Bond lengths (top), Charge distribution and dipole moment (middle), Emission spectrum (bottom). .....  | 11 |
| Figure S11. The optimized geometry of 2,7-ICAF in the ground S <sub>0</sub> state calculated on the TD-B3LYP/6-311++G(2d,2p)//PCM(solvent level of theory. Bond lengths (top), Charge distribution and dipole moment (middle), Vertical excitation (bottom). .....      | 12 |
| Figure S12. The optimized geometry of 2,7-ICAF in the first excited S <sub>1</sub> state calculated on the TD-B3LYP/6-311++G(2d,2p)//PCM(solvent level of theory. Bond lengths (top), Charge distribution and dipole moment (middle), Emission spectrum (bottom). ..... | 13 |

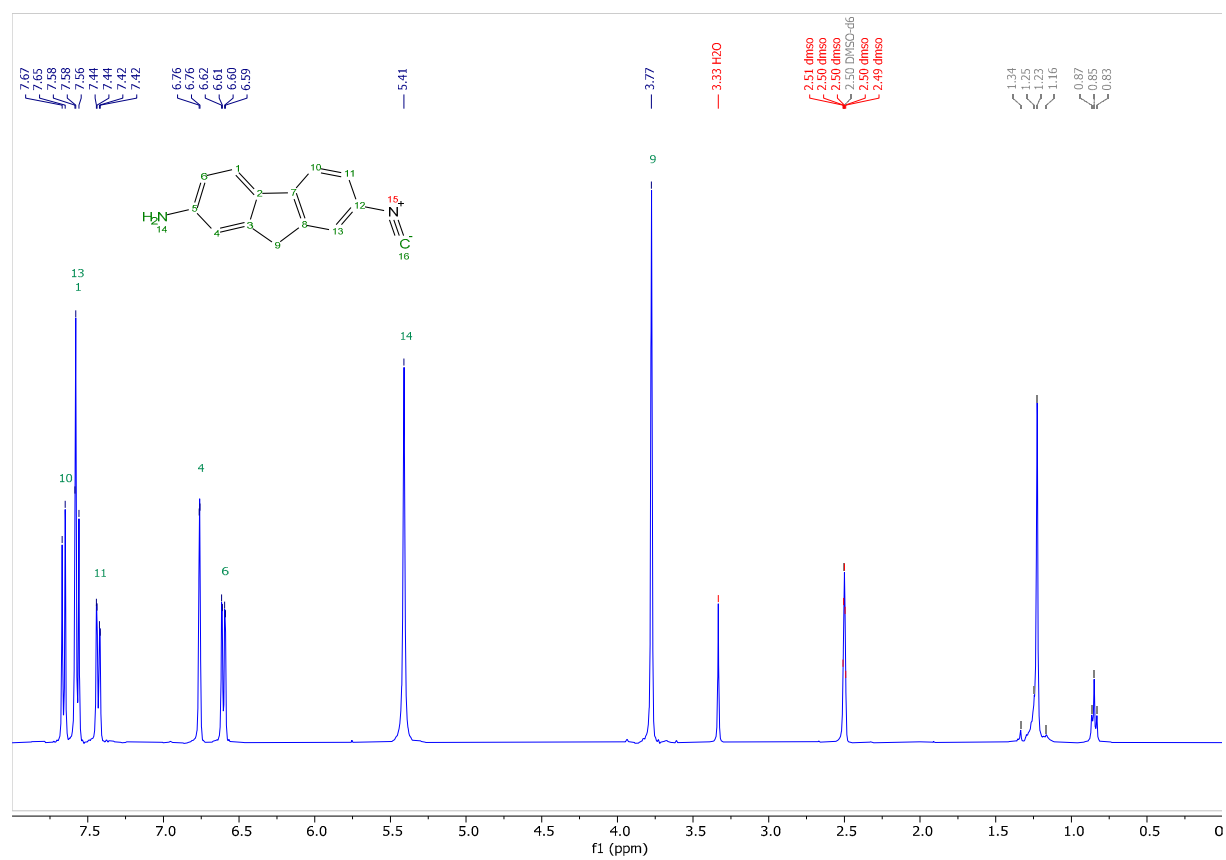

**Figure S1.** <sup>1</sup>H-NMR spectrum of 2-amino-7-isocyanofluorene (**2,7-ICAF**) recorded at 400 MHz in DMSO-*d*<sub>6</sub>.

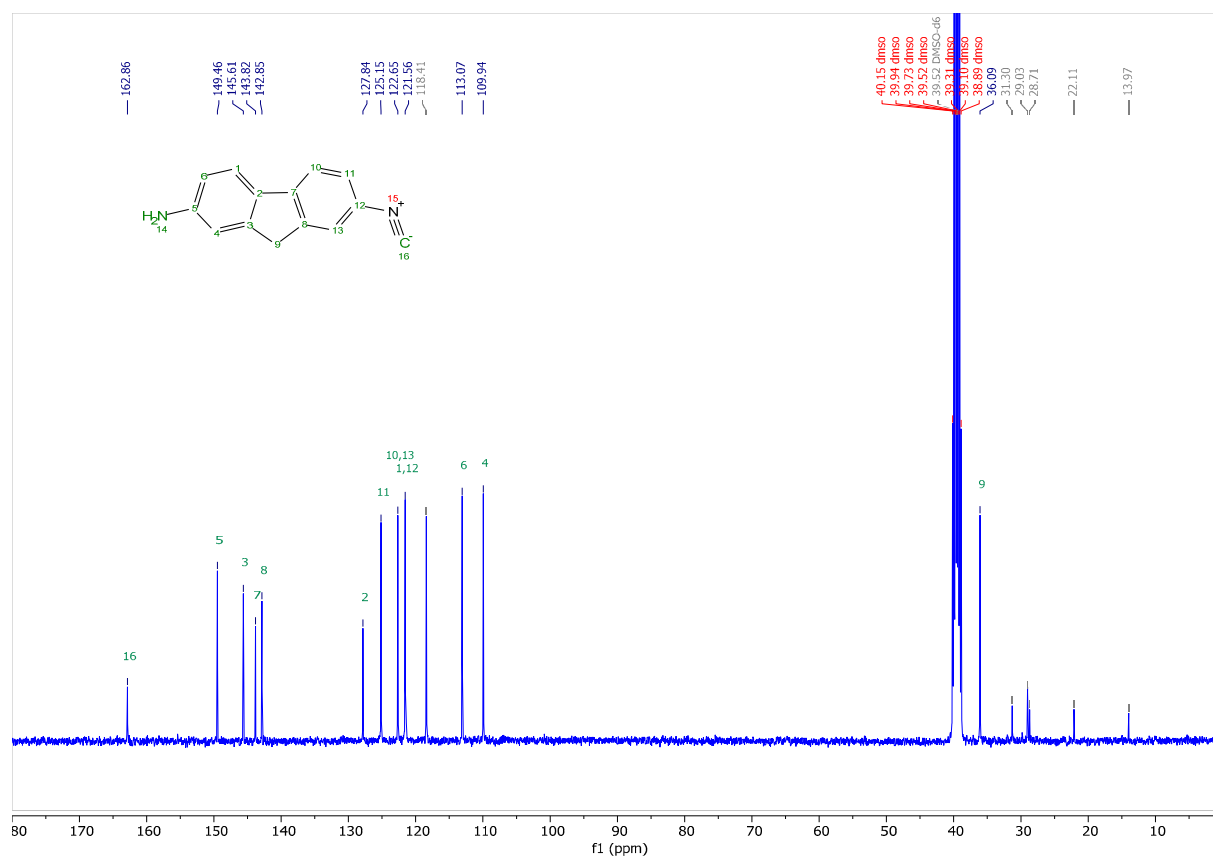

**Figure S2.** <sup>13</sup>C NMR spectrum of 2-amino-7-isocyanofluorene (2,7-ICAF) recorded at 101 MHz in DMSO-*d*<sub>6</sub>.

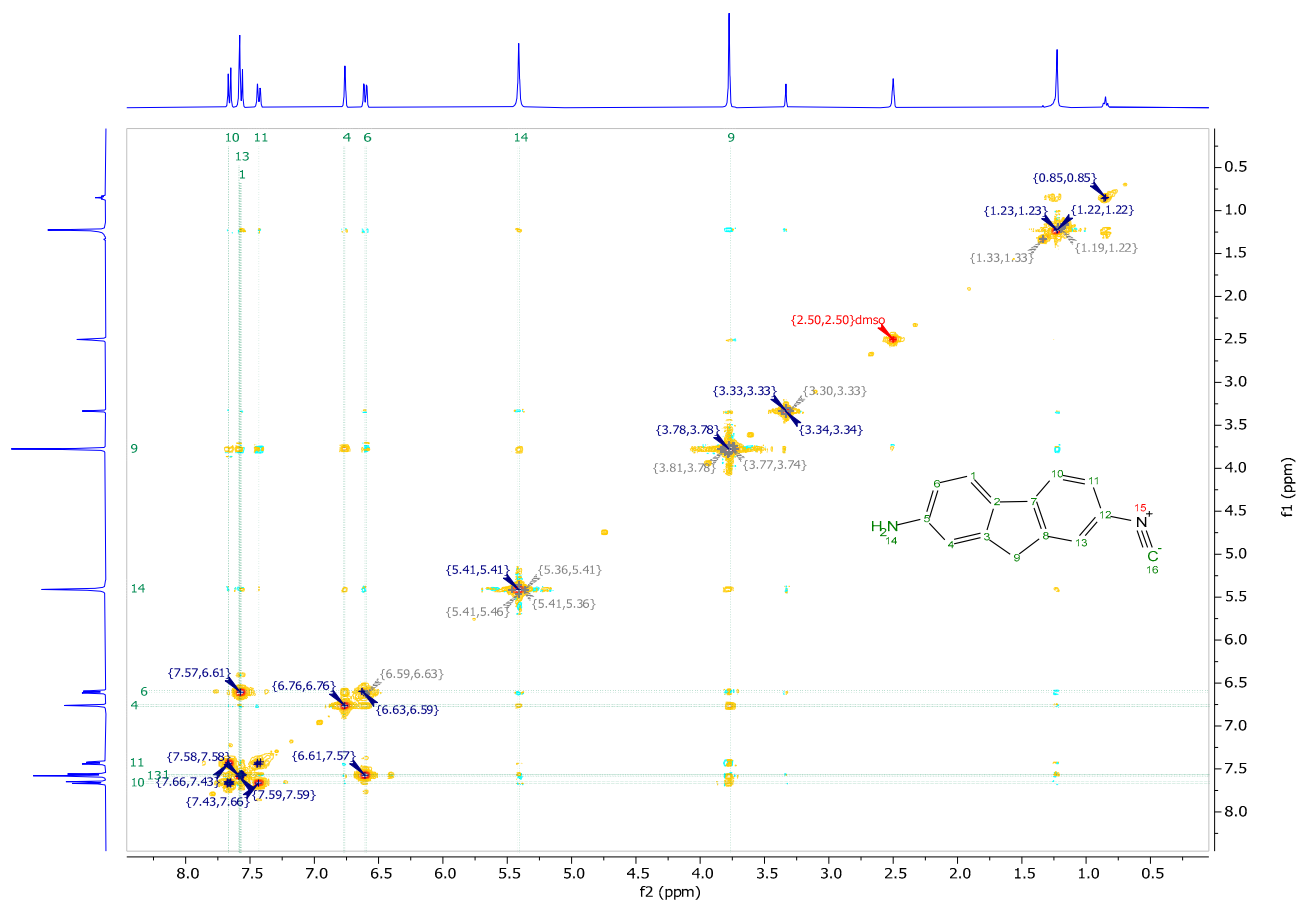

**Figure S3.** COSY spectrum of 2-amino-7-isocyanofluorene (**2,7-ICAF**) recorded at 400 MHz in DMSO- $d_6$ .

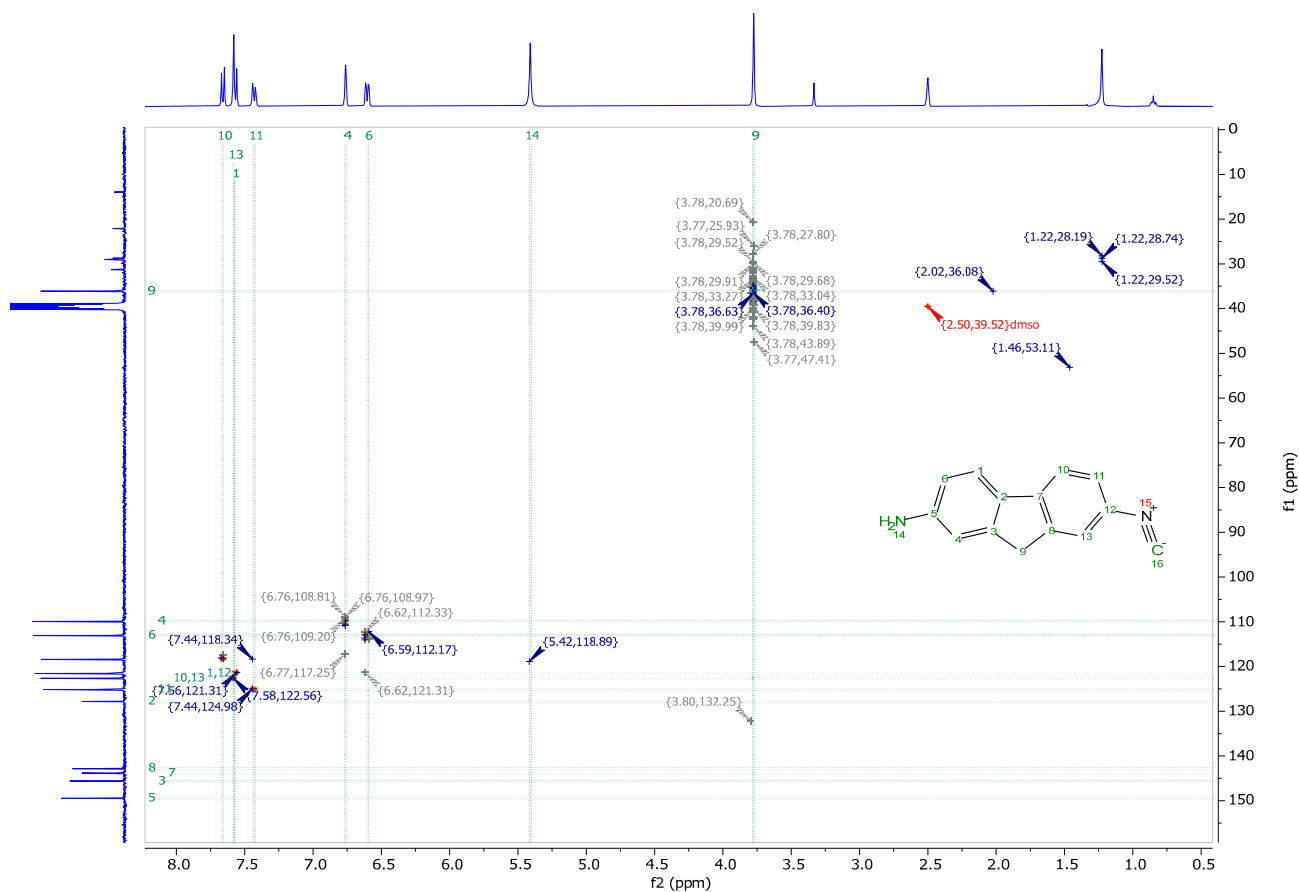

**Figure S4.** HSQC spectrum of 2-amino-7-isocyanofluorene (2,7-ICAF) recorded at 400 MHz and 101 MHz in DMSO- $d_6$ .

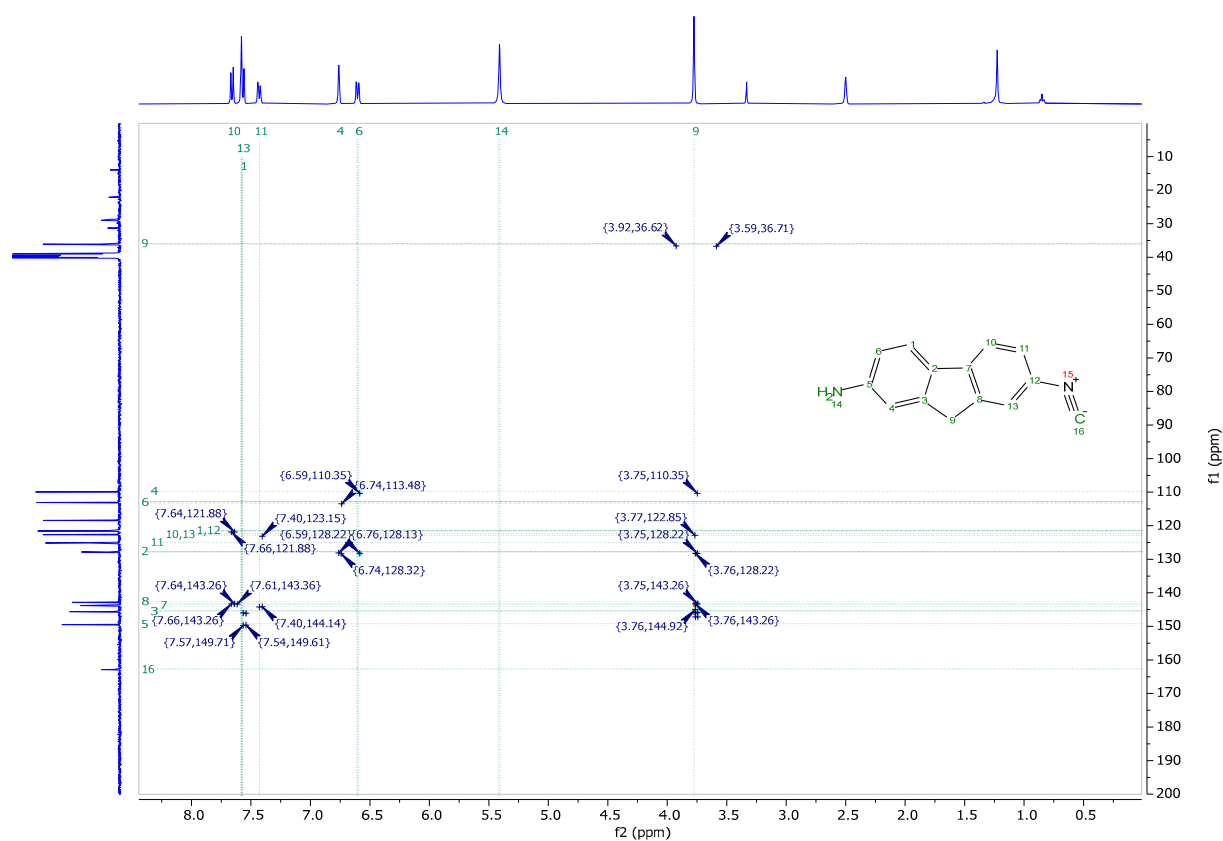

**Figure S5.** HMBC spectrum of 2-amino-7-isocyanofluorene (**2,7-ICAF**) recorded at 400 MHz and 101 MHz in DMSO-*d*<sub>6</sub>.

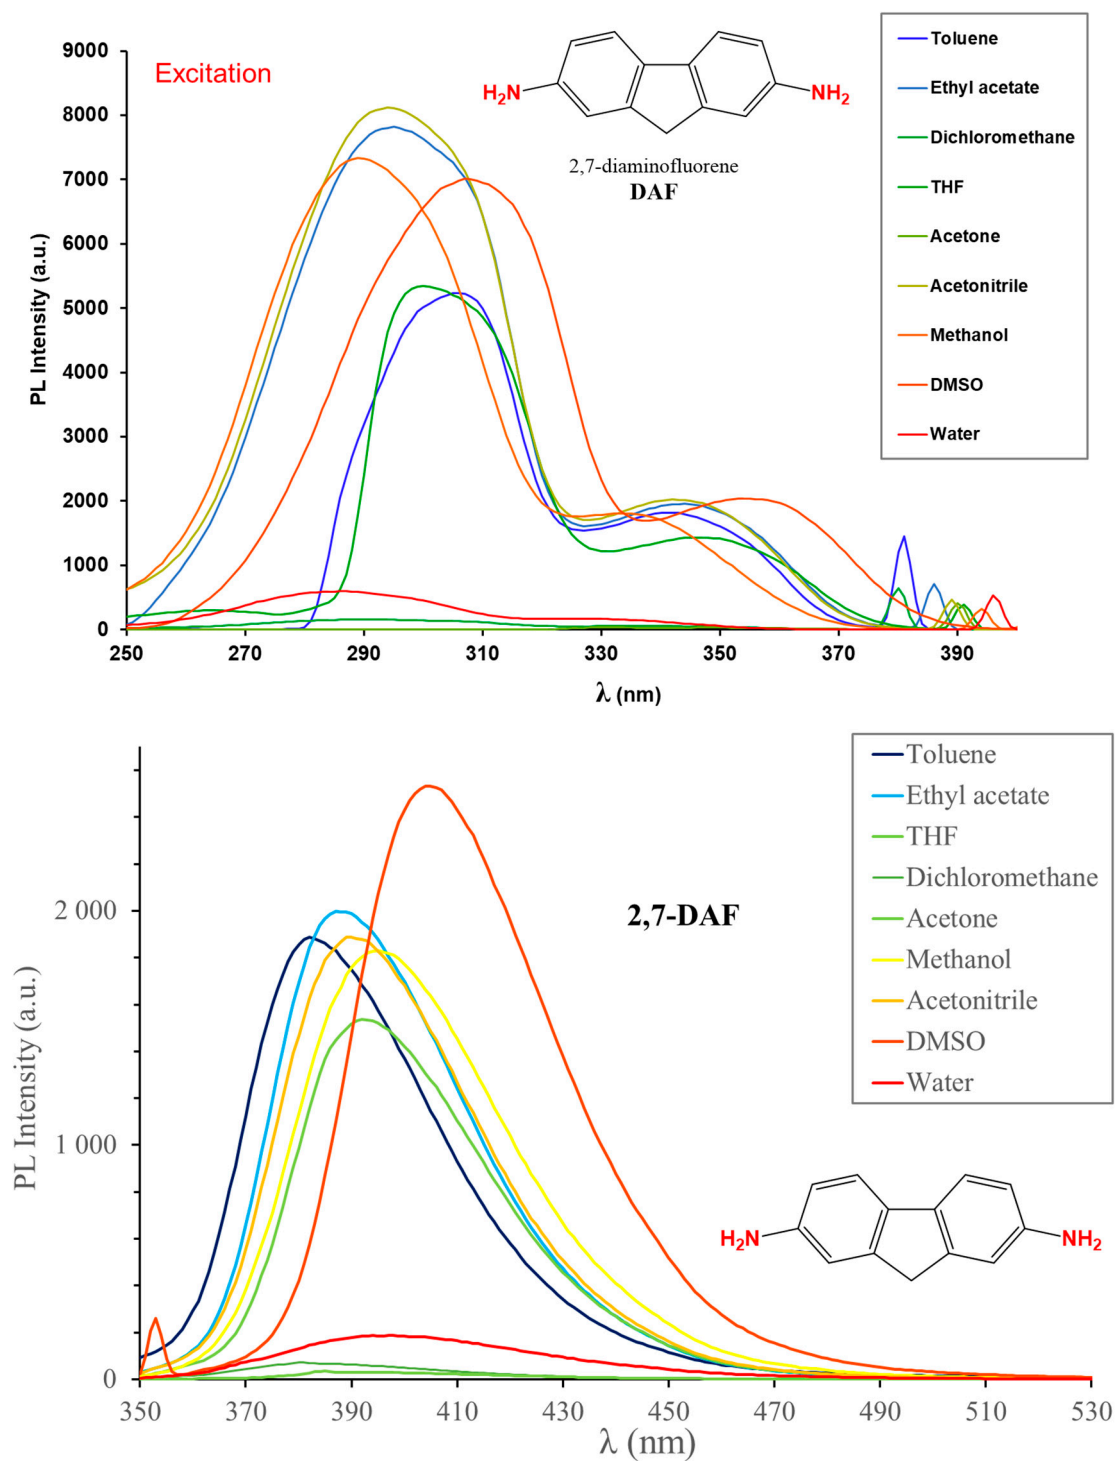

Figure S6. Steady-state fluorescence (**top**) excitation, (**bottom**) emission spectra of 2,7-DAF recorded in various solvents of different polarity. ([dye] =  $7.40 \times 10^{-6}$  M, T=20 °C).

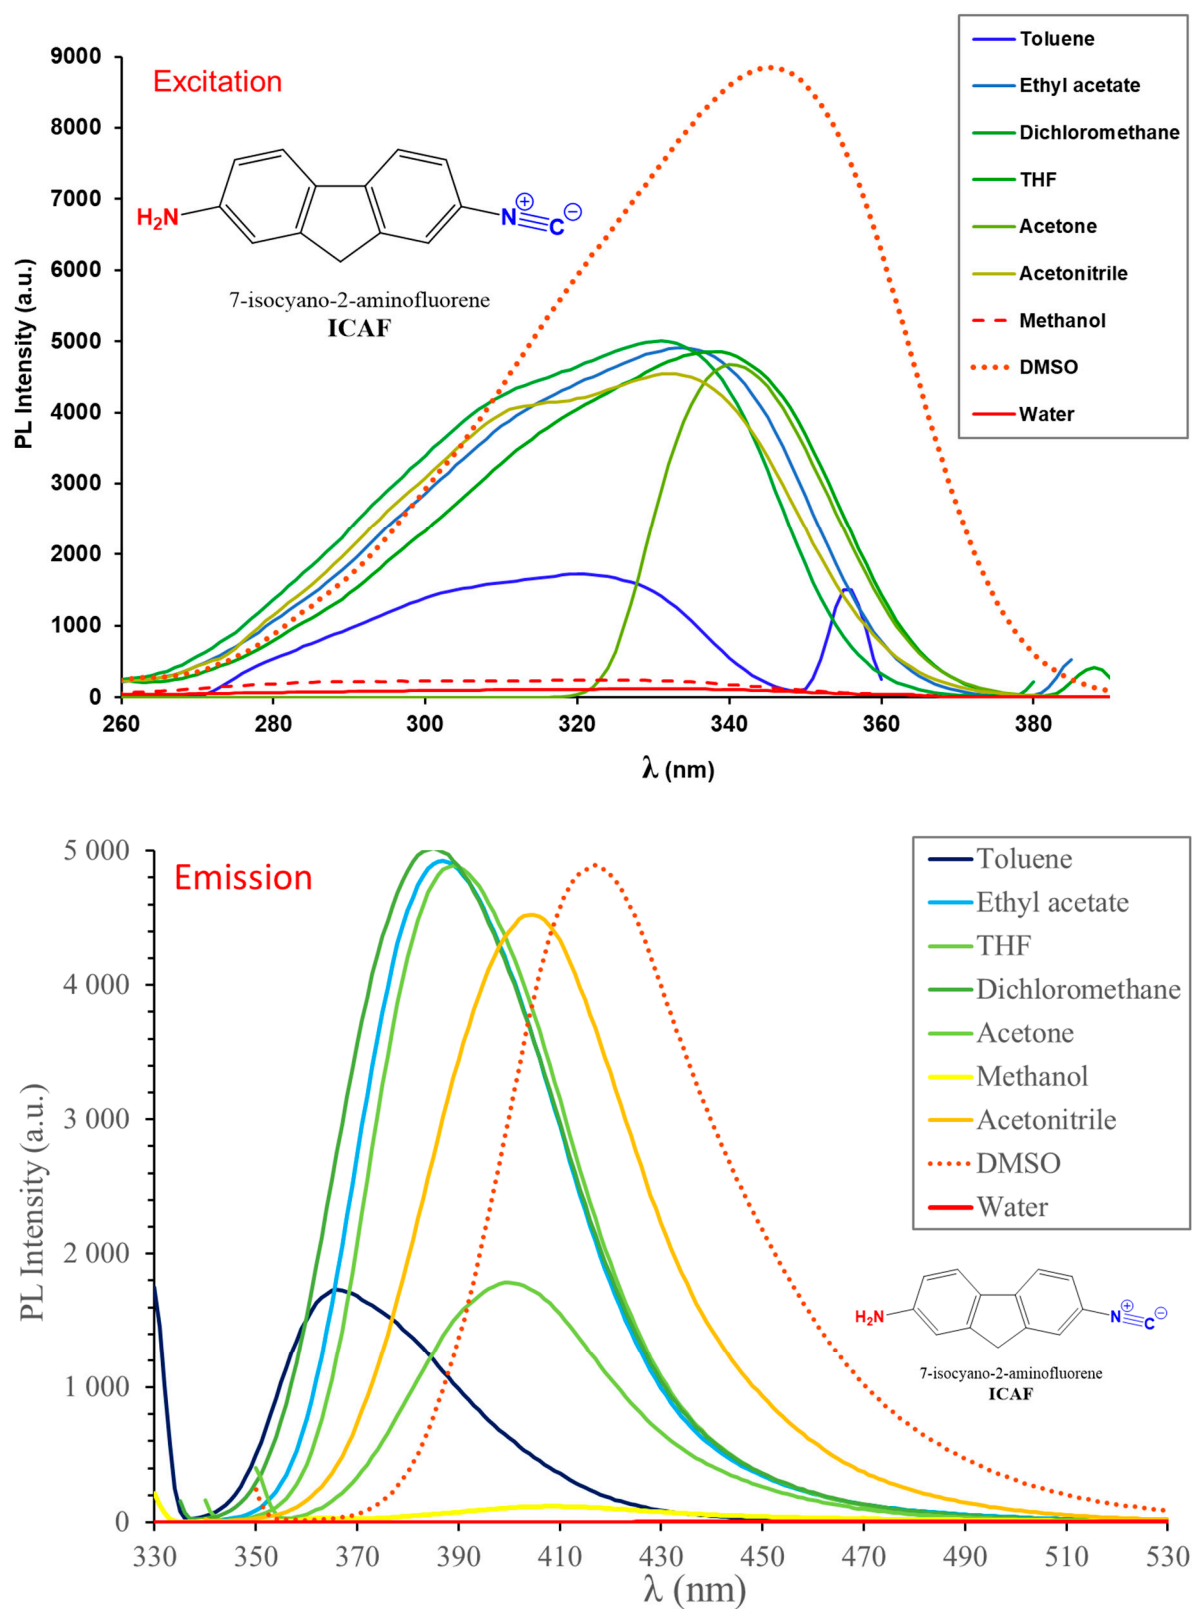

Figure S7. Steady-state fluorescence (**top**) excitation, (**bottom**) emission spectra of 2,7-ICAF recorded in various solvents of different polarity. ([dye] =  $4.84 \times 10^{-6}$  M, T=20 °C).



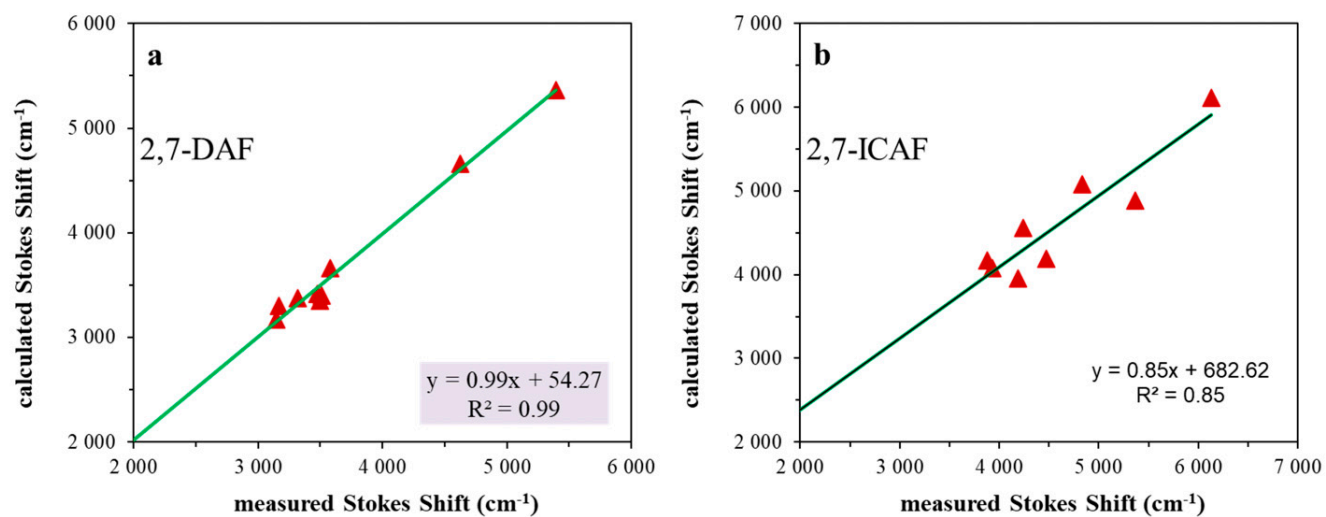

**Figure S8.** Catalán plots for the (a) 2,7-diamino-fluorene (2,7-DAF) and (b) 2-amino-7-isocyano-fluorene (2,7-ICAF).

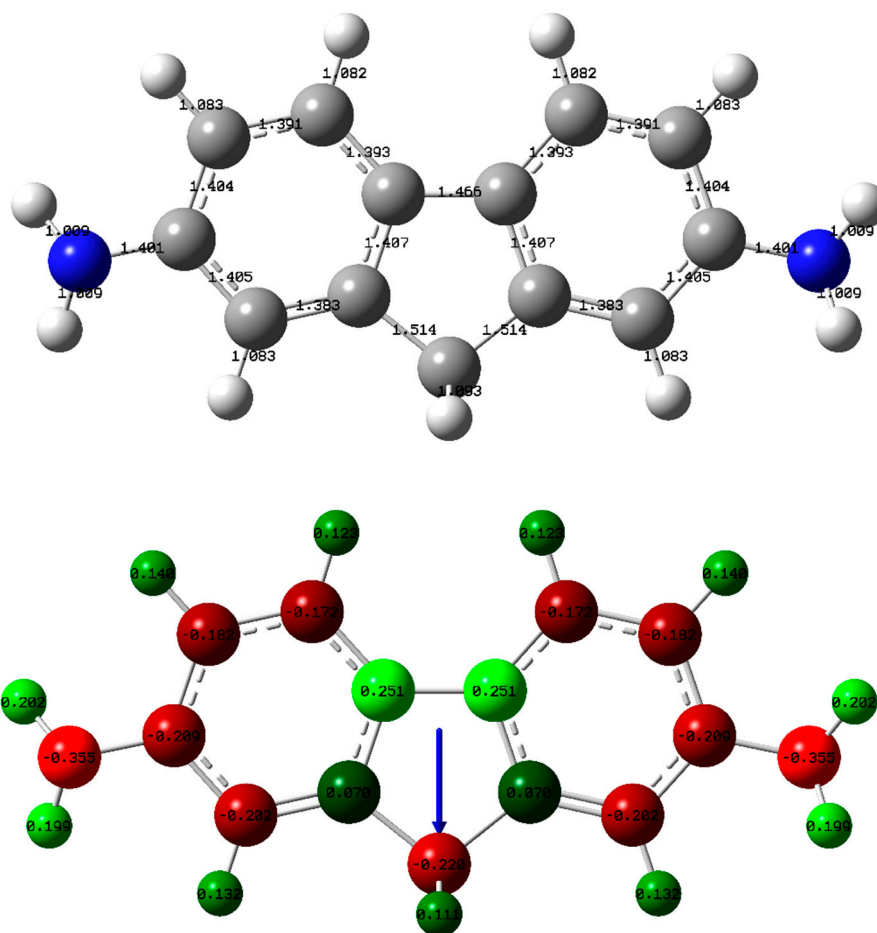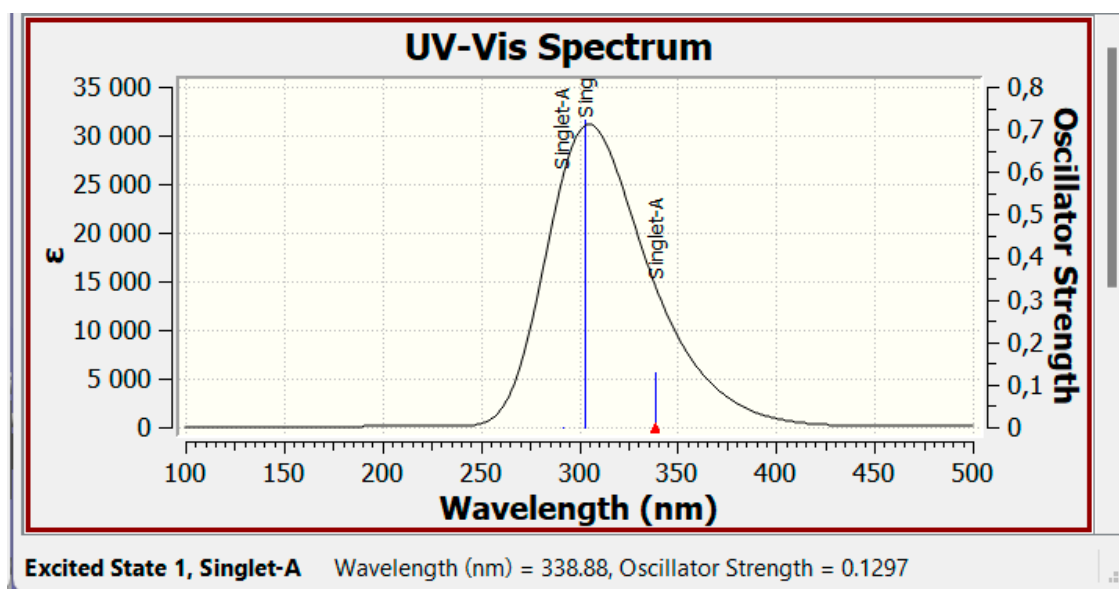

Figure S9. The optimized geometry of 2,7-DAF in the ground  $S_0$  state calculated on the TD-B3LYP/6-311++G(2d,2p)/PCM(solvent level of theory. Bond lengths (top), Charge distribution and dipole moment (middle), Vertical excitation (bottom).

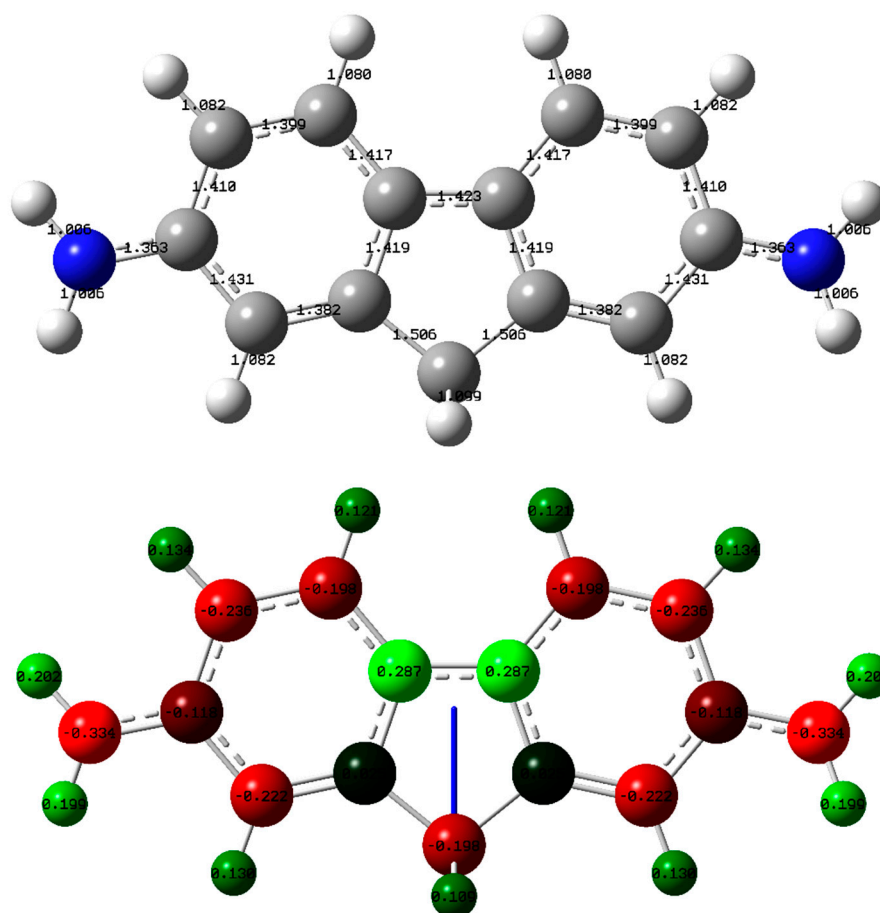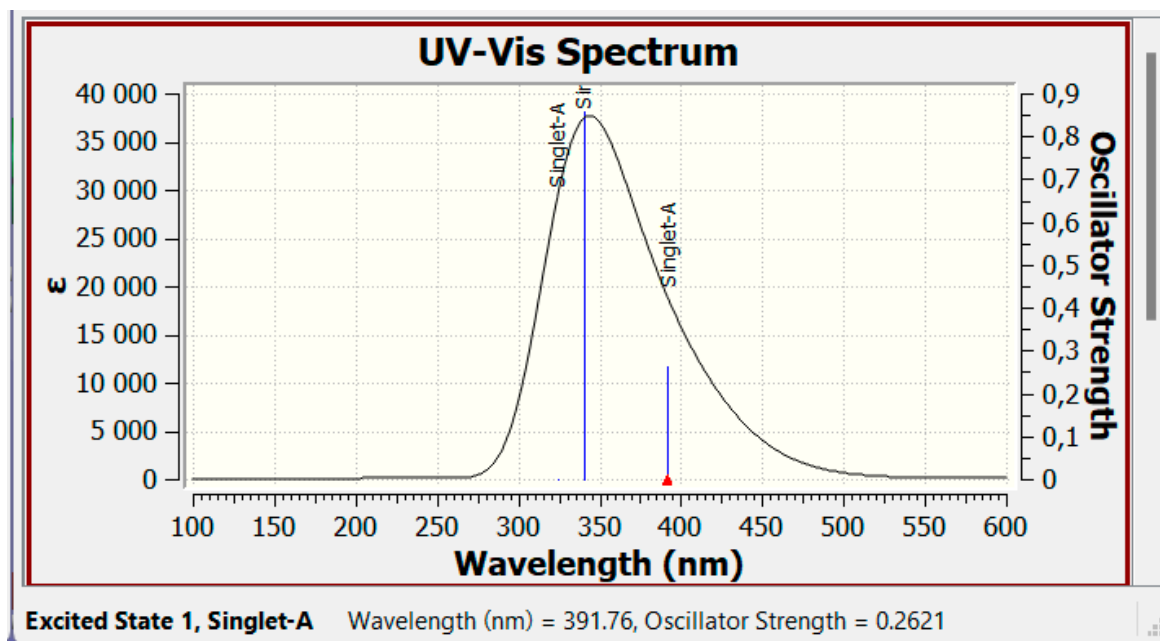

Figure S10. The optimized geometry of 2,7-DAF in the first excited  $S_1$  state calculated on the TD-B3LYP/6-311++G(2d,2p)//PCM(solvent level of theory. Bond lengths (top), Charge distribution and dipole moment (middle), Emission spectrum (bottom).



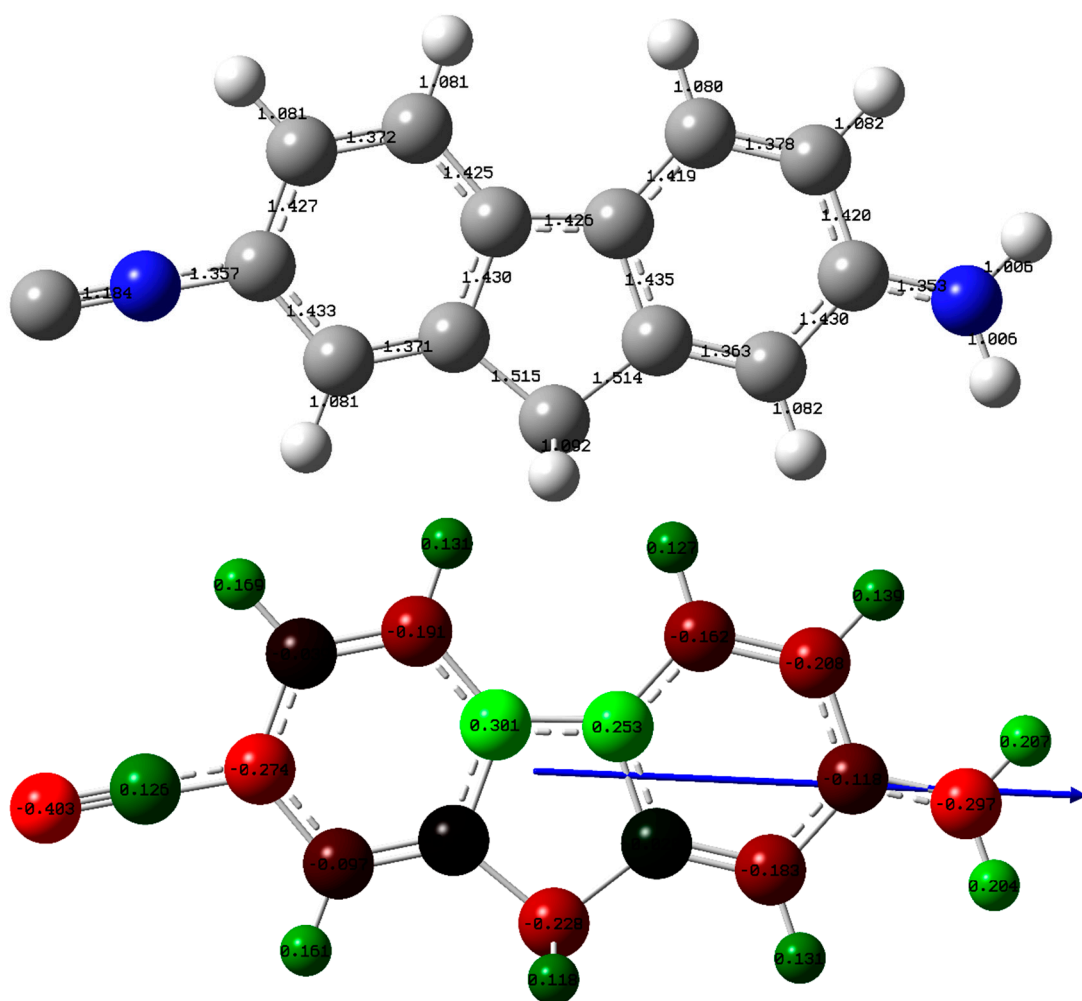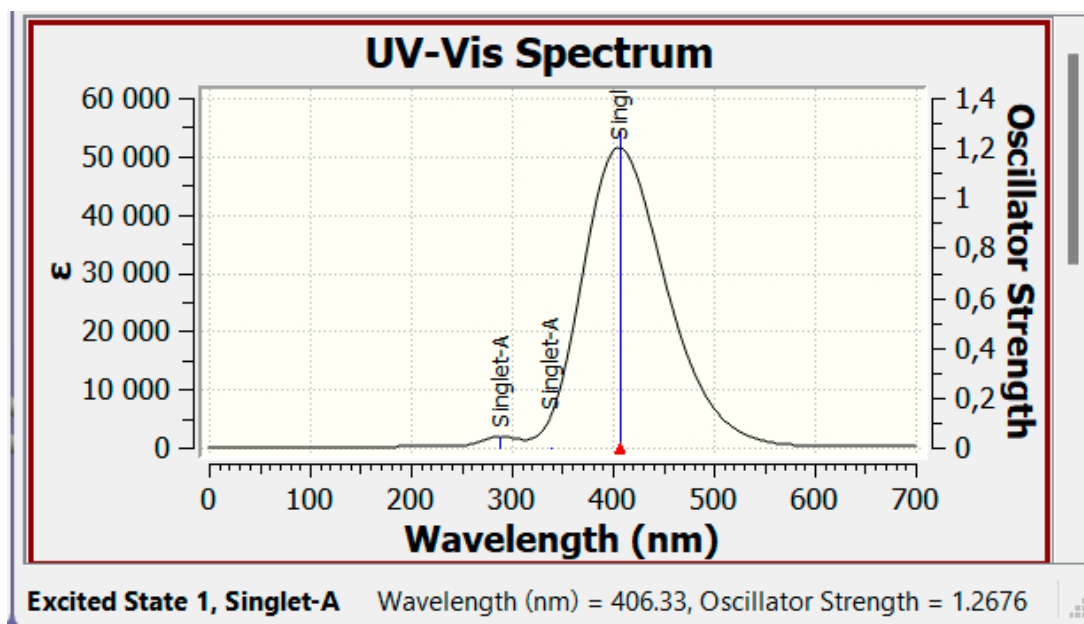

Figure S12. The optimized geometry of 2,7-ICAF in the first excited  $S_1$  state calculated on the TD-B3LYP/6-311++G(2d,2p)//PCM(solvent level of theory. Bond lengths (top), Charge distribution and dipole moment (middle), Emission spectrum (bottom).

## Theoretical results

Theoretical calculations were carried out by Gaussian16 software [1], using the standard convergence criteria given as default. Optimization and vibrational frequencies were carried out by the B3LYP method [2,3] using the 6-311++G(2d,2p) basis set and the IEFPCM method for implicit solvent model (DMSO). Thermodynamic functions were computed at 298.15 K. For wavelength prediction, the vertical excitation was modelled by the TD-B3LYP/6-311++G(2d,2p)//PCM(DMSO)[4] level of theory using the geometries optimized at B3LYP/6-311++G(2d,2p)//PCM(DMSO). The emission wavelengths were calculated after optimization using geometries provided by TD-B3LYP/6-311++G(2d,2p)//PCM(DMSO).

Ref:

- 1 M. J. Frisch, G. W. Trucks, H. B. Schlegel, G. E. Scuseria, M. A. Robb, J. R. Cheeseman, G. Scalmani, V. Barone, B. Mennucci, G. A. Petersson, H. Nakatsuji, M. Caricato, X. Li, H. P. Hratchian, A. F. Izmaylov, J. Bloino, G. Zheng, J. L. Sonnenberg, M. Hada, M. Ehara, K. Toyota, R. Fukuda, J. Hasegawa, M. Ishida, T. Nakajima, Y. Honda, O. Kitao, H. Nakai, T. Vreven, J. A. Montgomery Jr., J. E. Peralta, F. Ogliaro, M. Bearpark, J. J. Heyd, E. Brothers, K. N. Kudin, V. N. Staroverov, R. Kobayashi, J. Normand, K. Raghavachari, A. Rendell, J. C. Burant, S. S. Iyengar, J. Tomasi, M. Cossi, N. Rega, J. M. Millam, M. Klene, J. E. Knox, J. B. Cross, V. Bakken, C. Adamo, J. Jaramillo, R. Gomperts, R. E. Stratmann, O. Yazyev, A. J. Austin, R. Cammi, C. Pomelli, J. W. Ochterski, R. L. Martin, K. Morokuma, V. G. Zakrzewski, G. A. Voth, P. Salvador, J. J. Dannenberg, S. Dapprich, A. D. Daniels, Ö. Farkas, J. B. Foresman, J. V. Ortiz, J. Cioslowski and D. J. Fox, Gaussian Inc Wallingford CT, 2016.
- 2 Y. Zhao and D. G. Truhlar, *Theor. Chem. Acc.*, 2008, 120, 215–241.
- 3 A. D. Becke, *J. Chem. Phys.*, 1993, 98, 5648–5652.
- 4 J. Tomasi, B. Mennucci and R. Cammi, *Chem. Rev.*, 2005, 105, 2999–3094.

# Raw computational data

**Table S1.** Computed energies ( $E$ ), zero point energies, internal energies ( $U$ ), enthalpies ( $H$ ) and Gibbs free energies ( $G$ ) given in Hartree as well as entropies ( $S$ ) given in  $\text{J mol}^{-1} \text{K}^{-1}$  at B3LYP/6-311++G(2d,2p) basis set with the consideration of PCM solvent method using the parameter set of DMSO for ground ( $S_0$ ), single point excited ( $S_1$ ) as well as excited ( $S_1^*$ ) state of 2,7-DAF; 2,7-ICAF; DAB and ICAB.

| Comp.    | State   | Filenev                                                |     |       | E             | ZPE         | U           | H           | G           | S       |
|----------|---------|--------------------------------------------------------|-----|-------|---------------|-------------|-------------|-------------|-------------|---------|
| 2,7-DAF  | $S_0$   | 0501aaa_mol1_B3LYP6311++2d2p_PCMdmsol.log              |     |       | -612.33098784 | -612.110599 | -612.098633 | -612.097689 | -612.147918 | 105.717 |
|          | $S_1$   | 0501aab_mol1_TD_B3LYP6311++2d2p_PCMdmsol_sp.log        | 339 | 0.130 | -612.19653000 | –           | –           | –           | –           | –       |
|          |         |                                                        | 303 | 0.723 |               |             |             |             |             |         |
|          | $S_1^*$ | 0501aac_mol1_TD_B3LYP6311++2d2p_PCMdmsol_opt.log       | 392 | 0.262 | -612.20649000 | –           | –           | –           | –           | –       |
|          |         |                                                        | 340 | 0.860 |               |             |             |             |             |         |
| 2,7-ICAF | $S_0$   | 0503aaa_mol1_CN_B3LYP6311++2d2p_PCMdmsol.log           |     |       | -649.18940909 | -648.987660 | -648.975234 | -648.974290 | -649.026067 | 108.973 |
|          | $S_1$   | 0503aab_mol1_CN_TD_B3LYP6311++2d2p_PCMdmsol_sp.log     | 343 | 0.855 | -649.05664000 | –           | –           | –           | –           | –       |
|          | $S_1^*$ | 0503aac_mol1_CN_TD_B3LYP6311++2d2p_PCMdmsol_opt.log    | 406 | 1.267 | -649.07056000 |             |             |             |             |         |
| DAB      | $S_0$   | 0801aaa_H2NPhPhNH2_b3lyp6311++2d2p_PCMdmsol.log        |     |       | -574.20925824 | -573.995095 | -573.983253 | -573.982309 | -574.032946 | 106.573 |
|          | $S_1$   | 0801baa_H2NPhPhNH2_TD_b3lyp6311++2d2p_PCMdmsol_sp.log  | 298 | 0.819 | -574.06003000 | –           | –           | –           | –           | –       |
|          | $S_1^*$ | 0801caa_H2NPhPhNH2_TD_b3lyp6311++2d2p_PCMdmsol_opt.log | 388 | 1.196 | -574.07932000 |             |             |             |             |         |
| ICAB     | $S_0$   | 0831aaa_CNPhPhNH2_b3lyp6311++2d2p_PCMdmsol.log         |     |       | -611.06585651 | -610.870370 | -610.858041 | -610.857096 | -610.909329 | 109.933 |
|          | $S_1$   | 0831baa_CNPhPhNH2_TD_b3lyp6311++2d2p_PCMdmsol_sp.log   | 339 | 0.732 | -610.93145000 | –           | –           | –           | –           | –       |
|          | $S_1^*$ | 0831caa_CNPhPhNH2_TD_b3lyp6311++2d2p_PCMdmsol_opt.log  | 413 | 1.312 | -610.94726000 |             |             |             |             |         |

## The xyz coordinates of computed geometries

0501aaa\_mol1\_B3LYP6311++2d2p\_PCMdmso.log

Standard orientation:

| Center<br>Number | Atomic<br>Number | Atomic<br>Type | Coordinates (Angstroms) |           |           |
|------------------|------------------|----------------|-------------------------|-----------|-----------|
|                  |                  |                | X                       | Y         | Z         |
| 1                | 1                | 0              | 0.002980                | -2.401882 | 0.874888  |
| 2                | 6                | 0              | 3.024060                | 1.267556  | -0.003493 |
| 3                | 6                | 0              | 3.475956                | -0.061448 | -0.007374 |
| 4                | 6                | 0              | 2.533963                | -1.103356 | -0.007366 |
| 5                | 6                | 0              | 1.183595                | -0.802722 | -0.004454 |
| 6                | 6                | 0              | 0.732906                | 0.530293  | -0.002534 |
| 7                | 6                | 0              | 1.665219                | 1.565736  | -0.000909 |
| 8                | 1                | 0              | 3.750045                | 2.070667  | -0.002616 |
| 9                | 1                | 0              | 2.873299                | -2.132261 | -0.010436 |
| 10               | 1                | 0              | 1.348298                | 2.600536  | 0.004741  |
| 11               | 6                | 0              | 0.000001                | -1.747548 | -0.000312 |
| 12               | 1                | 0              | -0.002973               | -2.401385 | -0.875975 |
| 13               | 6                | 0              | -1.183583               | -0.802712 | 0.003637  |
| 14               | 6                | 0              | -2.533972               | -1.103361 | 0.007132  |
| 15               | 6                | 0              | -3.475947               | -0.061475 | 0.007888  |
| 16               | 6                | 0              | -3.024050               | 1.267557  | 0.003770  |
| 17               | 6                | 0              | -1.665234               | 1.565744  | 0.000485  |
| 18               | 6                | 0              | -0.732905               | 0.530281  | 0.001670  |
| 19               | 1                | 0              | -2.873271               | -2.132277 | 0.010139  |
| 20               | 1                | 0              | -3.750073               | 2.070627  | 0.003407  |
| 21               | 1                | 0              | -1.348303               | 2.600539  | -0.005828 |
| 22               | 7                | 0              | -4.846484               | -0.344309 | 0.078817  |
| 23               | 1                | 0              | -5.443851               | 0.383078  | -0.284269 |
| 24               | 7                | 0              | 4.846516                | -0.344393 | -0.077453 |
| 25               | 1                | 0              | 5.443758                | 0.383267  | 0.285287  |
| 26               | 1                | 0              | -5.109831               | -1.243753 | -0.294728 |
| 27               | 1                | 0              | 5.109634                | -1.243520 | 0.297006  |



0501aab\_mol1\_TD\_B3LYP6311++2d2p\_PCMdmso\_sp.log

Standard orientation:

| Center<br>Number | Atomic<br>Number | Atomic<br>Type | Coordinates (Angstroms) |           |           |
|------------------|------------------|----------------|-------------------------|-----------|-----------|
|                  |                  |                | X                       | Y         | Z         |
| 1                | 1                | 0              | -0.002980               | -2.401882 | -0.874888 |
| 2                | 6                | 0              | -3.024060               | 1.267556  | 0.003493  |
| 3                | 6                | 0              | -3.475956               | -0.061448 | 0.007374  |
| 4                | 6                | 0              | -2.533963               | -1.103356 | 0.007366  |
| 5                | 6                | 0              | -1.183595               | -0.802722 | 0.004454  |
| 6                | 6                | 0              | -0.732906               | 0.530293  | 0.002534  |
| 7                | 6                | 0              | -1.665219               | 1.565736  | 0.000909  |
| 8                | 1                | 0              | -3.750045               | 2.070667  | 0.002616  |
| 9                | 1                | 0              | -2.873299               | -2.132261 | 0.010436  |
| 10               | 1                | 0              | -1.348298               | 2.600536  | -0.004741 |
| 11               | 6                | 0              | -0.000001               | -1.747548 | 0.000312  |
| 12               | 1                | 0              | 0.002973                | -2.401385 | 0.875975  |
| 13               | 6                | 0              | 1.183583                | -0.802712 | -0.003637 |
| 14               | 6                | 0              | 2.533972                | -1.103361 | -0.007132 |
| 15               | 6                | 0              | 3.475947                | -0.061475 | -0.007888 |
| 16               | 6                | 0              | 3.024050                | 1.267557  | -0.003770 |
| 17               | 6                | 0              | 1.665234                | 1.565744  | -0.000485 |
| 18               | 6                | 0              | 0.732905                | 0.530281  | -0.001670 |
| 19               | 1                | 0              | 2.873271                | -2.132277 | -0.010139 |
| 20               | 1                | 0              | 3.750073                | 2.070627  | -0.003407 |
| 21               | 1                | 0              | 1.348303                | 2.600539  | 0.005828  |
| 22               | 7                | 0              | 4.846484                | -0.344309 | -0.078817 |
| 23               | 1                | 0              | 5.443851                | 0.383078  | 0.284269  |
| 24               | 7                | 0              | -4.846516               | -0.344393 | 0.077453  |
| 25               | 1                | 0              | -5.443758               | 0.383267  | -0.285287 |
| 26               | 1                | 0              | 5.109831                | -1.243753 | 0.294728  |
| 27               | 1                | 0              | -5.109634               | -1.243520 | -0.297006 |

0501aac\_mol1\_TD\_B3LYP6311++2d2p\_PCMdmso\_opt.log

Standard orientation:

| Center<br>Number | Atomic<br>Number | Atomic<br>Type | Coordinates (Angstroms) |           |           |
|------------------|------------------|----------------|-------------------------|-----------|-----------|
|                  |                  |                | X                       | Y         | Z         |
| 1                | 1                | 0              | -0.000720               | -2.450979 | -0.875539 |
| 2                | 6                | 0              | -2.989642               | 1.295215  | 0.001643  |
| 3                | 6                | 0              | -3.446140               | -0.039368 | 0.001974  |
| 4                | 6                | 0              | -2.523686               | -1.133269 | 0.002577  |
| 5                | 6                | 0              | -1.172343               | -0.841526 | 0.000963  |
| 6                | 6                | 0              | -0.711276               | 0.500261  | 0.000593  |
| 7                | 6                | 0              | -1.621087               | 1.586537  | 0.001614  |
| 8                | 1                | 0              | -3.721301               | 2.092655  | 0.002311  |
| 9                | 1                | 0              | -2.893799               | -2.149521 | 0.005445  |
| 10               | 1                | 0              | -1.270140               | 2.608149  | -0.000449 |
| 11               | 6                | 0              | 0.000000                | -1.786174 | 0.000001  |
| 12               | 1                | 0              | 0.000720                | -2.450975 | 0.875544  |
| 13               | 6                | 0              | 1.172343                | -0.841526 | -0.000963 |
| 14               | 6                | 0              | 2.523687                | -1.133269 | -0.002577 |
| 15               | 6                | 0              | 3.446140                | -0.039368 | -0.001974 |
| 16               | 6                | 0              | 2.989642                | 1.295215  | -0.001643 |
| 17               | 6                | 0              | 1.621087                | 1.586537  | -0.001613 |
| 18               | 6                | 0              | 0.711276                | 0.500261  | -0.000594 |
| 19               | 1                | 0              | 2.893800                | -2.149521 | -0.005452 |
| 20               | 1                | 0              | 3.721301                | 2.092655  | -0.002308 |
| 21               | 1                | 0              | 1.270140                | 2.608149  | 0.000444  |
| 22               | 7                | 0              | 4.782920                | -0.306020 | -0.034329 |
| 23               | 1                | 0              | 5.447341                | 0.434462  | 0.112210  |
| 24               | 7                | 0              | -4.782920               | -0.306020 | 0.034329  |
| 25               | 1                | 0              | -5.447341               | 0.434463  | -0.112209 |
| 26               | 1                | 0              | 5.110958                | -1.241206 | 0.136096  |
| 27               | 1                | 0              | -5.110958               | -1.241206 | -0.136099 |

0503aaa\_mol1\_CN\_B3LYP6311++2d2p\_PCMdmso.log

Standard orientation:

| Center<br>Number | Atomic<br>Number | Atomic<br>Type | Coordinates (Angstroms) |           |           |
|------------------|------------------|----------------|-------------------------|-----------|-----------|
|                  |                  |                | X                       | Y         | Z         |
| 1                | 1                | 0              | -0.190432               | -2.393445 | 0.874981  |
| 2                | 6                | 0              | 2.760531                | 1.348837  | -0.000738 |
| 3                | 6                | 0              | 3.211768                | 0.025936  | -0.001208 |
| 4                | 6                | 0              | 2.316980                | -1.051610 | -0.001381 |
| 5                | 6                | 0              | 0.963942                | -0.778072 | -0.000813 |
| 6                | 6                | 0              | 0.493947                | 0.551791  | -0.000339 |
| 7                | 6                | 0              | 1.397617                | 1.614983  | -0.000358 |
| 8                | 1                | 0              | 3.480627                | 2.153672  | -0.000429 |
| 9                | 1                | 0              | 2.694876                | -2.064066 | -0.001695 |
| 10               | 1                | 0              | 1.054438                | 2.640087  | 0.000307  |
| 11               | 6                | 0              | -0.202968               | -1.739597 | -0.000037 |
| 12               | 1                | 0              | -0.192781               | -2.391588 | -0.876552 |
| 13               | 6                | 0              | -1.397209               | -0.811199 | 0.002425  |
| 14               | 6                | 0              | -2.742478               | -1.129948 | 0.004240  |
| 15               | 6                | 0              | -3.696157               | -0.098127 | 0.005024  |
| 16               | 6                | 0              | -3.261063               | 1.240724  | 0.001011  |
| 17               | 6                | 0              | -1.910386               | 1.555523  | -0.001223 |
| 18               | 6                | 0              | -0.966646               | 0.528323  | 0.001094  |
| 19               | 1                | 0              | -3.069401               | -2.162304 | 0.006016  |
| 20               | 1                | 0              | -3.998508               | 2.032768  | 0.000265  |
| 21               | 1                | 0              | -1.605245               | 2.593424  | -0.006717 |
| 22               | 7                | 0              | -5.054875               | -0.392874 | 0.072206  |
| 23               | 1                | 0              | -5.673369               | 0.327595  | -0.266162 |
| 24               | 7                | 0              | 4.578056                | -0.226208 | -0.001253 |
| 25               | 1                | 0              | -5.320453               | -1.304708 | -0.265833 |
| 26               | 6                | 0              | 5.725118                | -0.440540 | -0.001170 |

Standard orientation:

| Center<br>Number | Atomic<br>Number | Atomic<br>Type | Coordinates (Angstroms) |           |           |
|------------------|------------------|----------------|-------------------------|-----------|-----------|
|                  |                  |                | X                       | Y         | Z         |
| 1                | 1                | 0              | 0.190432                | -2.393445 | -0.874981 |
| 2                | 6                | 0              | -2.760531               | 1.348837  | 0.000738  |
| 3                | 6                | 0              | -3.211768               | 0.025936  | 0.001208  |
| 4                | 6                | 0              | -2.316980               | -1.051610 | 0.001381  |
| 5                | 6                | 0              | -0.963942               | -0.778072 | 0.000813  |
| 6                | 6                | 0              | -0.493947               | 0.551791  | 0.000339  |
| 7                | 6                | 0              | -1.397617               | 1.614983  | 0.000358  |
| 8                | 1                | 0              | -3.480627               | 2.153672  | 0.000429  |
| 9                | 1                | 0              | -2.694876               | -2.064066 | 0.001695  |
| 10               | 1                | 0              | -1.054438               | 2.640087  | -0.000307 |
| 11               | 6                | 0              | 0.202968                | -1.739597 | 0.000037  |
| 12               | 1                | 0              | 0.192781                | -2.391588 | 0.876552  |
| 13               | 6                | 0              | 1.397209                | -0.811199 | -0.002425 |
| 14               | 6                | 0              | 2.742478                | -1.129948 | -0.004240 |
| 15               | 6                | 0              | 3.696157                | -0.098127 | -0.005024 |
| 16               | 6                | 0              | 3.261063                | 1.240724  | -0.001011 |
| 17               | 6                | 0              | 1.910386                | 1.555523  | 0.001223  |
| 18               | 6                | 0              | 0.966646                | 0.528323  | -0.001094 |
| 19               | 1                | 0              | 3.069401                | -2.162304 | -0.006016 |
| 20               | 1                | 0              | 3.998508                | 2.032768  | -0.000265 |
| 21               | 1                | 0              | 1.605245                | 2.593424  | 0.006717  |
| 22               | 7                | 0              | 5.054875                | -0.392874 | -0.072206 |
| 23               | 1                | 0              | 5.673369                | 0.327595  | 0.266162  |
| 24               | 7                | 0              | -4.578056               | -0.226208 | 0.001253  |
| 25               | 1                | 0              | 5.320453                | -1.304708 | 0.265833  |
| 26               | 6                | 0              | -5.725118               | -0.440540 | 0.001170  |

Standard orientation:

| Center<br>Number | Atomic<br>Number | Atomic<br>Type | Coordinates (Angstroms) |           |           |
|------------------|------------------|----------------|-------------------------|-----------|-----------|
|                  |                  |                | X                       | Y         | Z         |
| 1                | 1                | 0              | 0.200897                | -2.419739 | -0.875807 |
| 2                | 6                | 0              | -2.739970               | 1.369549  | 0.000123  |
| 3                | 6                | 0              | -3.222350               | 0.026135  | 0.000030  |
| 4                | 6                | 0              | -2.305624               | -1.075055 | -0.000017 |
| 5                | 6                | 0              | -0.962311               | -0.802358 | -0.000002 |
| 6                | 6                | 0              | -0.473954               | 0.541261  | 0.000038  |
| 7                | 6                | 0              | -1.393358               | 1.630144  | 0.000124  |
| 8                | 1                | 0              | -3.458595               | 2.176602  | 0.000211  |
| 9                | 1                | 0              | -2.687066               | -2.086044 | -0.000050 |
| 10               | 1                | 0              | -1.041683               | 2.652689  | 0.000231  |
| 11               | 6                | 0              | 0.206030                | -1.767403 | -0.000058 |
| 12               | 1                | 0              | 0.200962                | -2.419756 | 0.875680  |
| 13               | 6                | 0              | 1.403076                | -0.840642 | -0.000080 |
| 14               | 6                | 0              | 2.731063                | -1.146671 | -0.000029 |
| 15               | 6                | 0              | 3.690456                | -0.086609 | 0.000010  |
| 16               | 6                | 0              | 3.249916                | 1.263136  | -0.000146 |
| 17               | 6                | 0              | 1.906675                | 1.572430  | -0.000185 |
| 18               | 6                | 0              | 0.952351                | 0.521884  | -0.000074 |
| 19               | 1                | 0              | 3.075632                | -2.172363 | 0.000006  |
| 20               | 1                | 0              | 3.991227                | 2.050693  | -0.000274 |
| 21               | 1                | 0              | 1.590303                | 2.605431  | -0.000338 |
| 22               | 7                | 0              | 5.012021                | -0.375680 | 0.000223  |
| 23               | 1                | 0              | 5.705681                | 0.352930  | 0.000405  |
| 24               | 7                | 0              | -4.559649               | -0.206813 | -0.000009 |
| 25               | 1                | 0              | 5.339420                | -1.326799 | 0.000186  |
| 26               | 6                | 0              | -5.722565               | -0.428500 | -0.000026 |

0801aaa\_H2NPhPhNH2\_b3lyp6311++2d2p\_PCMDmso.log

Standard orientation:

| Center<br>Number | Atomic<br>Number | Atomic<br>Type | Coordinates (Angstroms) |           |           |
|------------------|------------------|----------------|-------------------------|-----------|-----------|
|                  |                  |                | X                       | Y         | Z         |
| 1                | 6                | 0              | -0.740956               | 0.000931  | -0.001901 |
| 2                | 6                | 0              | -1.475236               | -1.139397 | -0.357755 |
| 3                | 6                | 0              | -2.862887               | -1.145429 | -0.361552 |
| 4                | 6                | 0              | -3.585757               | 0.000977  | -0.007454 |
| 5                | 6                | 0              | -2.864365               | 1.147148  | 0.350210  |
| 6                | 6                | 0              | -1.476612               | 1.140829  | 0.352438  |
| 7                | 6                | 0              | 0.740956                | 0.000948  | 0.001870  |
| 8                | 6                | 0              | 1.475214                | -1.139388 | 0.357761  |
| 9                | 6                | 0              | 2.862874                | -1.145449 | 0.361514  |
| 10               | 6                | 0              | 3.585716                | 0.000937  | 0.007449  |
| 11               | 6                | 0              | 2.864383                | 1.147134  | -0.350185 |
| 12               | 6                | 0              | 1.476620                | 1.140832  | -0.352473 |
| 13               | 1                | 0              | -0.954467               | -2.039133 | -0.656567 |
| 14               | 1                | 0              | -3.394401               | -2.042867 | -0.651793 |
| 15               | 1                | 0              | -3.396771               | 2.044829  | 0.638195  |
| 16               | 1                | 0              | -0.956854               | 2.038659  | 0.658686  |
| 17               | 1                | 0              | 0.954407                | -2.039087 | 0.656611  |
| 18               | 1                | 0              | 3.394356                | -2.042959 | 0.651596  |
| 19               | 1                | 0              | 3.396801                | 2.044850  | -0.638027 |
| 20               | 1                | 0              | 0.956902                | 2.038654  | -0.658810 |
| 21               | 7                | 0              | -4.981734               | 0.019508  | -0.072161 |
| 22               | 1                | 0              | -5.423198               | -0.881083 | 0.034313  |
| 23               | 1                | 0              | -5.423813               | 0.712748  | 0.511977  |
| 24               | 7                | 0              | 4.981808                | 0.019610  | 0.072313  |
| 25               | 1                | 0              | 5.423143                | -0.881109 | -0.034003 |
| 26               | 1                | 0              | 5.423664                | 0.712242  | -0.512774 |

0801baa\_H2NPhPhNH2\_TD\_b3lyp6311++2d2p\_PCMdms0\_sp.log

Standard orientation:

| Center<br>Number | Atomic<br>Number | Atomic<br>Type | Coordinates (Angstroms) |           |           |
|------------------|------------------|----------------|-------------------------|-----------|-----------|
|                  |                  |                | X                       | Y         | Z         |
| 1                | 6                | 0              | -0.740956               | -0.000931 | 0.001901  |
| 2                | 6                | 0              | -1.475236               | 1.139397  | 0.357755  |
| 3                | 6                | 0              | -2.862887               | 1.145429  | 0.361552  |
| 4                | 6                | 0              | -3.585757               | -0.000977 | 0.007454  |
| 5                | 6                | 0              | -2.864365               | -1.147148 | -0.350210 |
| 6                | 6                | 0              | -1.476612               | -1.140829 | -0.352438 |
| 7                | 6                | 0              | 0.740956                | -0.000948 | -0.001870 |
| 8                | 6                | 0              | 1.475214                | 1.139388  | -0.357761 |
| 9                | 6                | 0              | 2.862874                | 1.145449  | -0.361514 |
| 10               | 6                | 0              | 3.585716                | -0.000937 | -0.007449 |
| 11               | 6                | 0              | 2.864383                | -1.147134 | 0.350185  |
| 12               | 6                | 0              | 1.476620                | -1.140832 | 0.352473  |
| 13               | 1                | 0              | -0.954467               | 2.039133  | 0.656567  |
| 14               | 1                | 0              | -3.394401               | 2.042867  | 0.651793  |
| 15               | 1                | 0              | -3.396771               | -2.044829 | -0.638195 |
| 16               | 1                | 0              | -0.956854               | -2.038659 | -0.658686 |
| 17               | 1                | 0              | 0.954407                | 2.039087  | -0.656611 |
| 18               | 1                | 0              | 3.394356                | 2.042959  | -0.651596 |
| 19               | 1                | 0              | 3.396801                | -2.044850 | 0.638027  |
| 20               | 1                | 0              | 0.956902                | -2.038654 | 0.658810  |
| 21               | 7                | 0              | -4.981734               | -0.019508 | 0.072161  |
| 22               | 1                | 0              | -5.423198               | 0.881083  | -0.034313 |
| 23               | 1                | 0              | -5.423813               | -0.712748 | -0.511977 |
| 24               | 7                | 0              | 4.981808                | -0.019610 | -0.072313 |
| 25               | 1                | 0              | 5.423143                | 0.881109  | 0.034003  |
| 26               | 1                | 0              | 5.423664                | -0.712242 | 0.512774  |

Standard orientation:

| Center<br>Number | Atomic<br>Number | Atomic<br>Type | Coordinates (Angstroms) |           |           |
|------------------|------------------|----------------|-------------------------|-----------|-----------|
|                  |                  |                | X                       | Y         | Z         |
| 1                | 6                | 0              | -0.704912               | -0.000534 | 0.000149  |
| 2                | 6                | 0              | -1.484094               | -1.224722 | -0.001654 |
| 3                | 6                | 0              | -2.854014               | -1.215204 | -0.004724 |
| 4                | 6                | 0              | -3.582903               | 0.000467  | -0.001998 |
| 5                | 6                | 0              | -2.853914               | 1.215117  | -0.004853 |
| 6                | 6                | 0              | -1.483534               | 1.224822  | -0.001846 |
| 7                | 6                | 0              | 0.704923                | -0.000523 | 0.000402  |
| 8                | 6                | 0              | 1.484105                | -1.224677 | 0.002211  |
| 9                | 6                | 0              | 2.853986                | -1.215198 | 0.004798  |
| 10               | 6                | 0              | 3.582933                | 0.000546  | 0.001627  |
| 11               | 6                | 0              | 2.853952                | 1.215160  | 0.004956  |
| 12               | 6                | 0              | 1.483555                | 1.224861  | 0.002462  |
| 13               | 1                | 0              | -0.984472               | -2.180774 | 0.002910  |
| 14               | 1                | 0              | -3.396154               | -2.152867 | -0.008520 |
| 15               | 1                | 0              | -3.395888               | 2.152928  | -0.008784 |
| 16               | 1                | 0              | -0.983637               | 2.180641  | 0.002785  |
| 17               | 1                | 0              | 0.984454                | -2.180717 | -0.001793 |
| 18               | 1                | 0              | 3.396195                | -2.152816 | 0.008745  |
| 19               | 1                | 0              | 3.395880                | 2.152997  | 0.008830  |
| 20               | 1                | 0              | 0.983653                | 2.180675  | -0.001804 |
| 21               | 7                | 0              | -4.963433               | -0.000045 | -0.061165 |
| 22               | 1                | 0              | -5.439751               | -0.842859 | 0.221083  |
| 23               | 1                | 0              | -5.440326               | 0.843235  | 0.218657  |
| 24               | 7                | 0              | 4.963326                | -0.000128 | 0.059668  |
| 25               | 1                | 0              | 5.439738                | -0.843143 | -0.221617 |
| 26               | 1                | 0              | 5.440552                | 0.843221  | -0.219194 |



0831aaa\_CNPhPhNH2\_b3lyp6311++2d2p\_PCMdmso.log

Standard orientation:

| Center<br>Number | Atomic<br>Number | Atomic<br>Type | Coordinates (Angstroms) |           |           |
|------------------|------------------|----------------|-------------------------|-----------|-----------|
|                  |                  |                | X                       | Y         | Z         |
| 1                | 6                | 0              | -0.986573               | 0.000460  | -0.001752 |
| 2                | 6                | 0              | -1.718515               | -1.148141 | -0.336250 |
| 3                | 6                | 0              | -3.103963               | -1.152428 | -0.342806 |
| 4                | 6                | 0              | -3.825948               | 0.001479  | -0.004790 |
| 5                | 6                | 0              | -3.103997               | 1.154428  | 0.336458  |
| 6                | 6                | 0              | -1.718487               | 1.148993  | 0.333183  |
| 7                | 6                | 0              | 0.492057                | 0.000087  | -0.000351 |
| 8                | 6                | 0              | 1.218855                | -1.150554 | 0.344958  |
| 9                | 6                | 0              | 2.604235                | -1.159973 | 0.345898  |
| 10               | 6                | 0              | 3.298252                | -0.000344 | 0.001299  |
| 11               | 6                | 0              | 2.605032                | 1.159506  | -0.344051 |
| 12               | 6                | 0              | 1.219626                | 1.150506  | -0.344768 |
| 13               | 1                | 0              | -1.198975               | -2.052958 | -0.620224 |
| 14               | 1                | 0              | -3.636659               | -2.052909 | -0.619770 |
| 15               | 1                | 0              | -3.636415               | 2.055240  | 0.613041  |
| 16               | 1                | 0              | -1.198804               | 2.051661  | 0.623672  |
| 17               | 1                | 0              | 0.695274                | -2.048655 | 0.638686  |
| 18               | 1                | 0              | 3.149765                | -2.050583 | 0.620817  |
| 19               | 1                | 0              | 3.151162                | 2.049916  | -0.618425 |
| 20               | 1                | 0              | 0.696597                | 2.048638  | -0.639379 |
| 21               | 7                | 0              | -5.214735               | 0.018895  | -0.066213 |
| 22               | 1                | 0              | -5.667265               | -0.876877 | 0.027868  |
| 23               | 1                | 0              | -5.666972               | 0.730152  | 0.486590  |
| 24               | 7                | 0              | 4.687024                | -0.000642 | 0.001948  |
| 25               | 6                | 0              | 5.853806                | -0.000918 | 0.002469  |

0831baa\_CNPhPhNH2\_TD\_b3lyp6311++2d2p\_PCMdms0\_sp.log

Standard orientation:

| Center<br>Number | Atomic<br>Number | Atomic<br>Type | Coordinates (Angstroms) |           |           |
|------------------|------------------|----------------|-------------------------|-----------|-----------|
|                  |                  |                | X                       | Y         | Z         |
| 1                | 6                | 0              | 0.986573                | -0.000460 | -0.001752 |
| 2                | 6                | 0              | 1.718515                | 1.148141  | -0.336250 |
| 3                | 6                | 0              | 3.103963                | 1.152428  | -0.342806 |
| 4                | 6                | 0              | 3.825948                | -0.001479 | -0.004790 |
| 5                | 6                | 0              | 3.103997                | -1.154428 | 0.336458  |
| 6                | 6                | 0              | 1.718487                | -1.148993 | 0.333183  |
| 7                | 6                | 0              | -0.492057               | -0.000087 | -0.000351 |
| 8                | 6                | 0              | -1.218855               | 1.150554  | 0.344958  |
| 9                | 6                | 0              | -2.604235               | 1.159973  | 0.345898  |
| 10               | 6                | 0              | -3.298252               | 0.000344  | 0.001299  |
| 11               | 6                | 0              | -2.605032               | -1.159506 | -0.344051 |
| 12               | 6                | 0              | -1.219626               | -1.150506 | -0.344768 |
| 13               | 1                | 0              | 1.198975                | 2.052958  | -0.620224 |
| 14               | 1                | 0              | 3.636659                | 2.052909  | -0.619770 |
| 15               | 1                | 0              | 3.636415                | -2.055240 | 0.613041  |
| 16               | 1                | 0              | 1.198804                | -2.051661 | 0.623672  |
| 17               | 1                | 0              | -0.695274               | 2.048655  | 0.638686  |
| 18               | 1                | 0              | -3.149765               | 2.050583  | 0.620817  |
| 19               | 1                | 0              | -3.151162               | -2.049916 | -0.618425 |
| 20               | 1                | 0              | -0.696597               | -2.048638 | -0.639379 |
| 21               | 7                | 0              | 5.214735                | -0.018895 | -0.066213 |
| 22               | 1                | 0              | 5.667265                | 0.876877  | 0.027868  |
| 23               | 1                | 0              | 5.666972                | -0.730152 | 0.486590  |
| 24               | 7                | 0              | -4.687024               | 0.000642  | 0.001948  |
| 25               | 6                | 0              | -5.853806               | 0.000918  | 0.002469  |

0831caa\_CNPhPhNH2\_TD\_b3lyp6311++2d2p\_PCMdmso\_opt.log

Standard orientation:

| Center<br>Number | Atomic<br>Number | Atomic<br>Type | Coordinates (Angstroms) |           |           |
|------------------|------------------|----------------|-------------------------|-----------|-----------|
|                  |                  |                | X                       | Y         | Z         |
| 1                | 6                | 0              | -0.971152               | -0.000007 | -0.000076 |
| 2                | 6                | 0              | -1.734185               | -1.213564 | -0.066825 |
| 3                | 6                | 0              | -3.103713               | -1.216194 | -0.066898 |
| 4                | 6                | 0              | -3.832879               | 0.000005  | 0.000053  |
| 5                | 6                | 0              | -3.103695               | 1.216202  | 0.066888  |
| 6                | 6                | 0              | -1.734168               | 1.213559  | 0.066684  |
| 7                | 6                | 0              | 0.469887                | -0.000009 | -0.000074 |
| 8                | 6                | 0              | 1.228093                | -1.216640 | 0.066037  |
| 9                | 6                | 0              | 2.598600                | -1.223581 | 0.070377  |
| 10               | 6                | 0              | 3.320828                | -0.000001 | 0.000019  |
| 11               | 6                | 0              | 2.598596                | 1.223574  | -0.070414 |
| 12               | 6                | 0              | 1.228090                | 1.216624  | -0.066163 |
| 13               | 1                | 0              | -1.228095               | -2.163087 | -0.130996 |
| 14               | 1                | 0              | -3.642947               | -2.152111 | -0.123029 |
| 15               | 1                | 0              | -3.642910               | 2.152130  | 0.123029  |
| 16               | 1                | 0              | -1.228063               | 2.163079  | 0.130766  |
| 17               | 1                | 0              | 0.723340                | -2.168185 | 0.130134  |
| 18               | 1                | 0              | 3.142233                | -2.155450 | 0.129537  |
| 19               | 1                | 0              | 3.142226                | 2.155445  | -0.129567 |
| 20               | 1                | 0              | 0.723334                | 2.168164  | -0.130325 |
| 21               | 7                | 0              | -5.184019               | 0.000014  | 0.000064  |
| 22               | 1                | 0              | -5.706704               | -0.858460 | -0.044805 |
| 23               | 1                | 0              | -5.706699               | 0.858450  | 0.045703  |
| 24               | 7                | 0              | 4.679743                | 0.000006  | 0.000084  |
| 25               | 6                | 0              | 5.861402                | 0.000013  | 0.000144  |
